# Supplementary material for: Enhancing Evolutionary Couplings with Deep Convolutional Neural Networks
Source: PubMed Central journal article supplement — Cell Syst. Author manuscript; Available in PMC 2019 Jan 24. (PMC5808454; doi:10.1016/j.cels.2017.11.014), 2017-12-20
Supplement: NIHMS930472-supplement-1.pdf [file NIHMS930472-supplement-1.pdf]

Figure S1. DeepContact integrates local information to improve contact prediction.

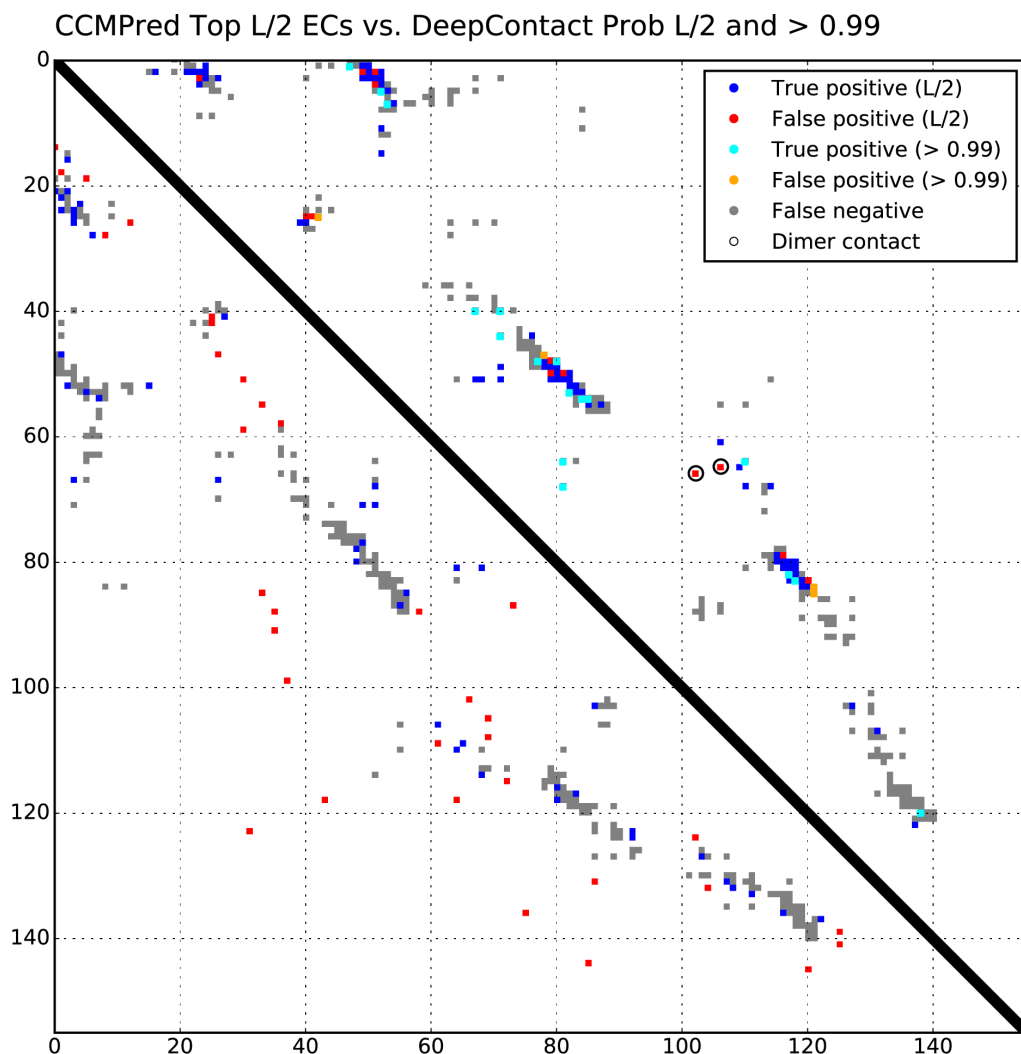

**Figure S1. DeepContact integrates local information to improve contact prediction. Related to Figure 3A.**

Example of how DeepContact (upper right triangle) improves contact prediction over CCMPred (lower left triangle) input for PDB: 3LRT\_A using both an L/2 cutoff and a probability cutoff of 0.99 (Cherney et al., 2011). The probability cutoff lets through an additional 21 contacts (cyan for true positives and orange for false positives) while the precision remains 0.83 for DeepContact versus 0.56 for CCMPred.
